# Supplementary material for: Anti-Anemic Effect of Antioxidant-Rich Apple Vinegar against Phenylhydrazine-Induced Hemolytic Anemia in Rats
Source: MDPI journal article supplement (doi:10.3390/life12020239), 2022-02-04

# = Shimadzu LabSolutions Quant. Browser Data Report =

Acquired by : System Administrator  
 Data Acquired : 05/10/2021 18:03:45  
 Sample Type : Unknown  
 Sample Name : D1  
 Sample ID :  
 Sample Amount : 1  
 Dilution Factor : 1  
 Vial# : 9  
 Injection Volume : 5  $\mu$ L  
 Data Filename : D1\_010.lcd  
 Method Filename : polifenoli screening SIM.lcm  
 Processed by : System Administrator  
 Modified Date : 05/10/2021 18:04:29

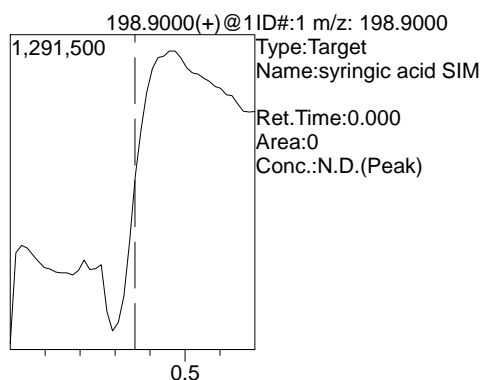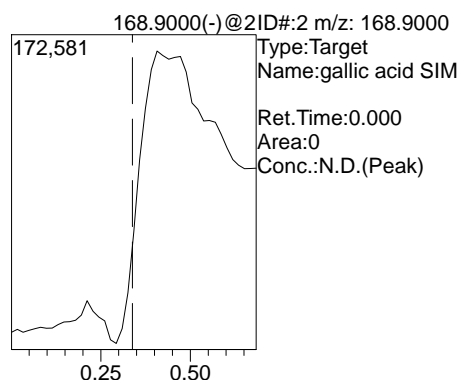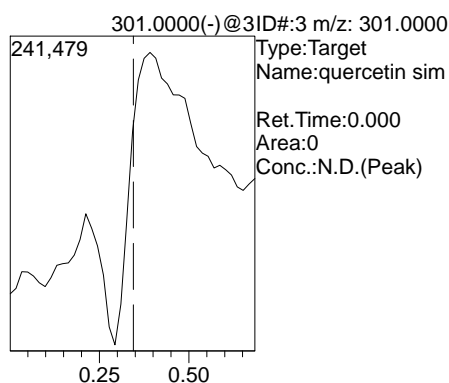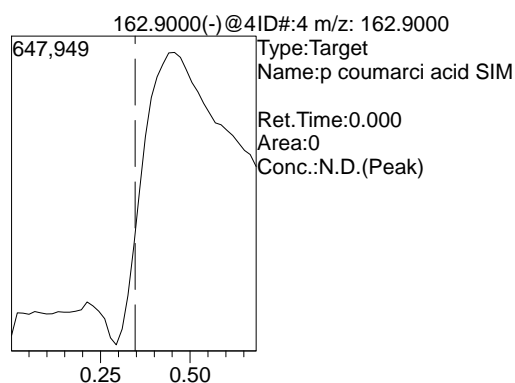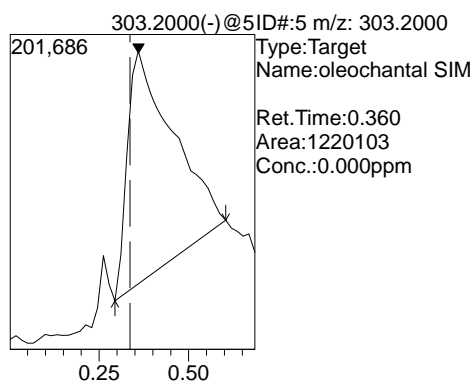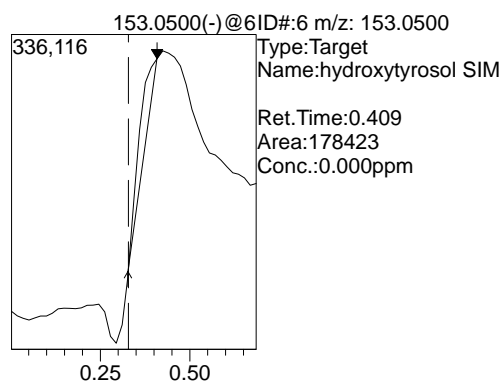

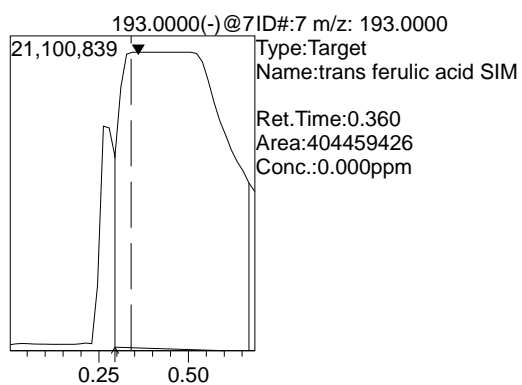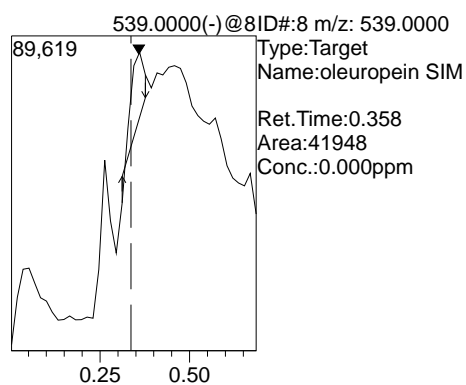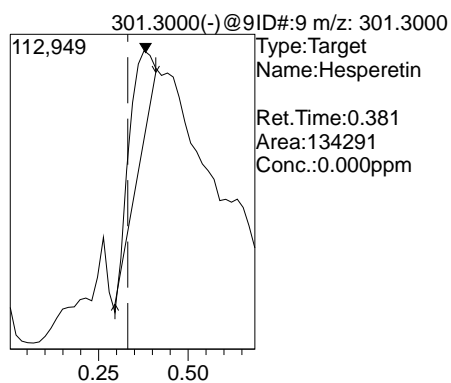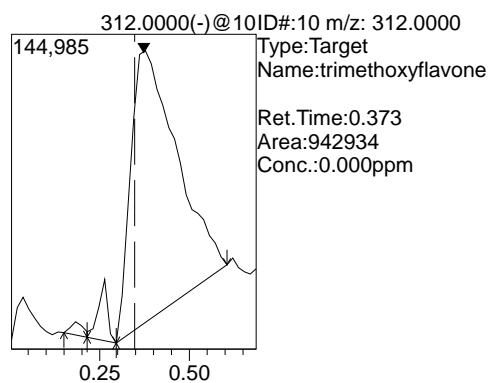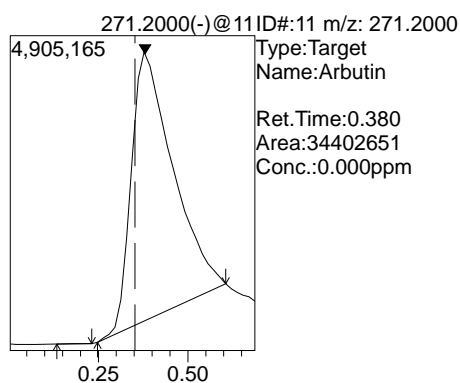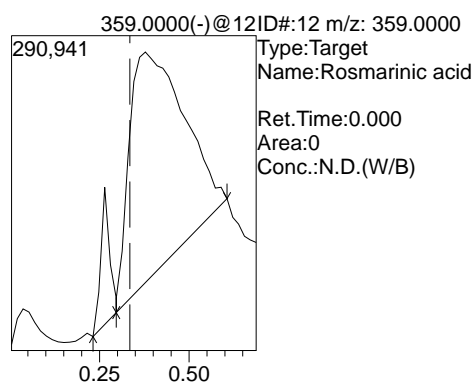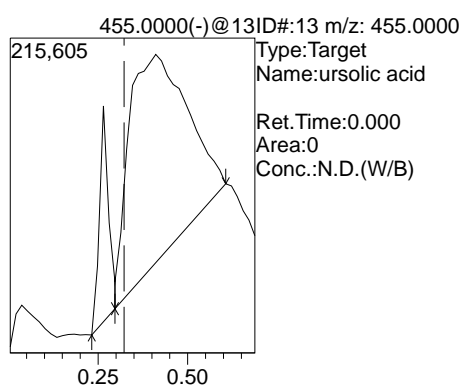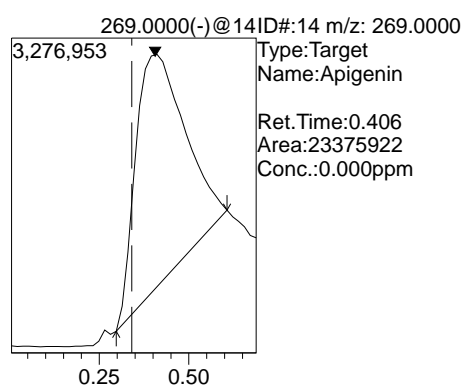

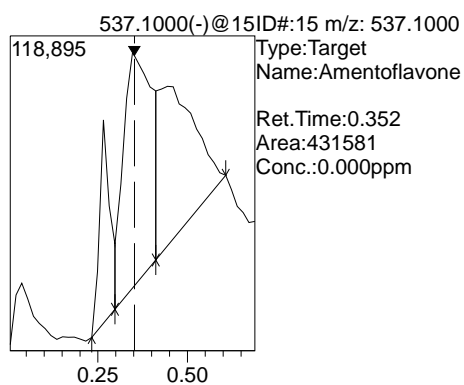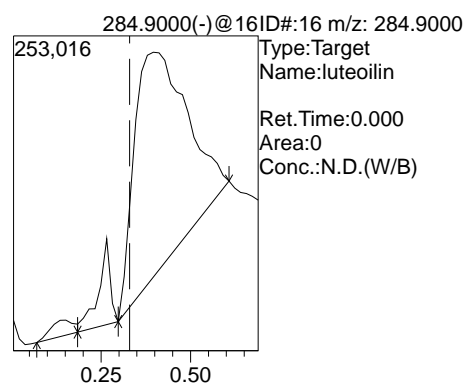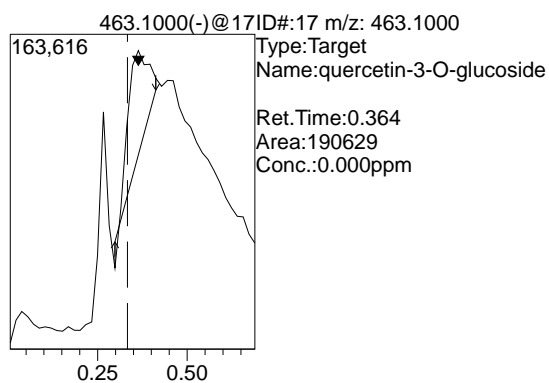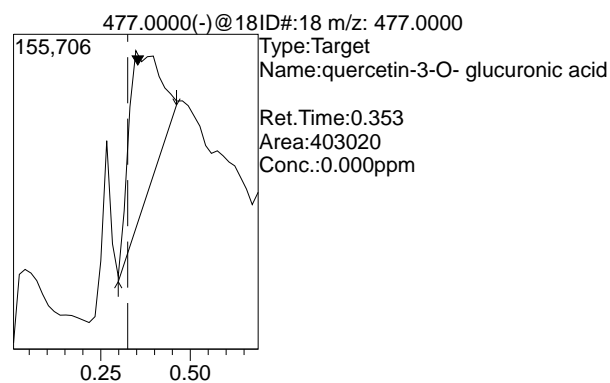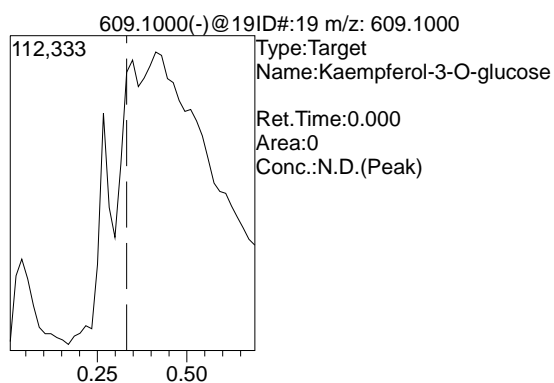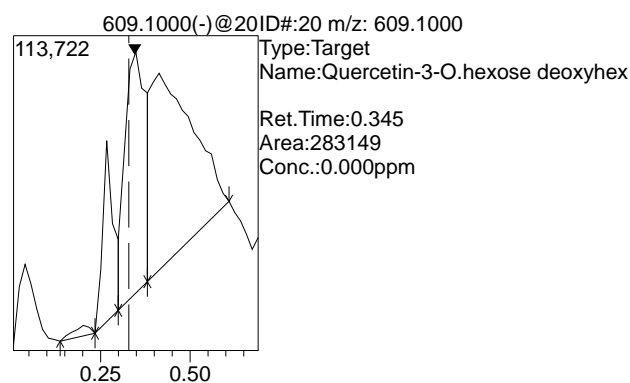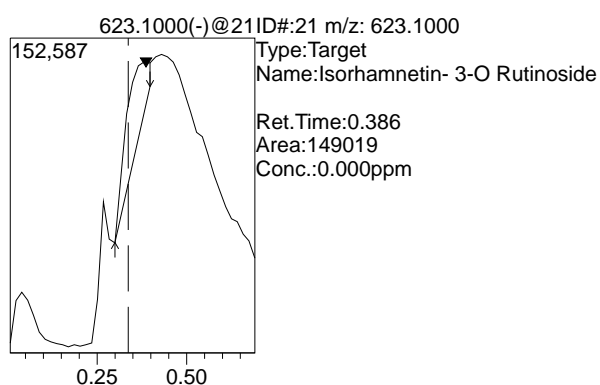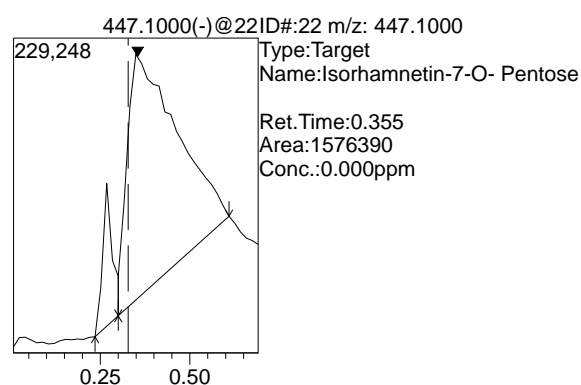

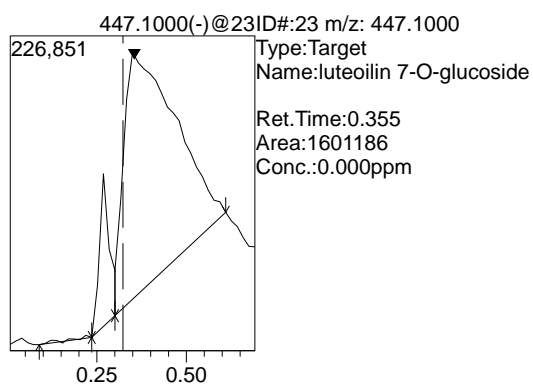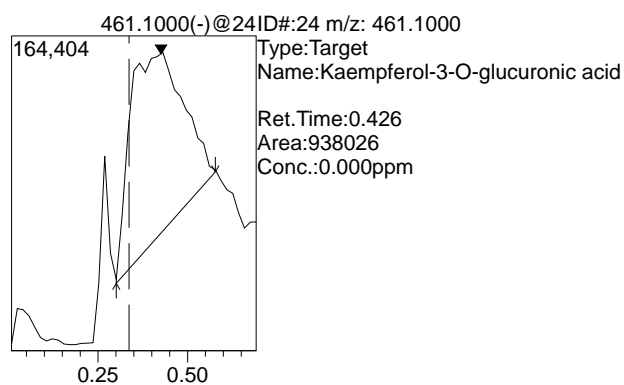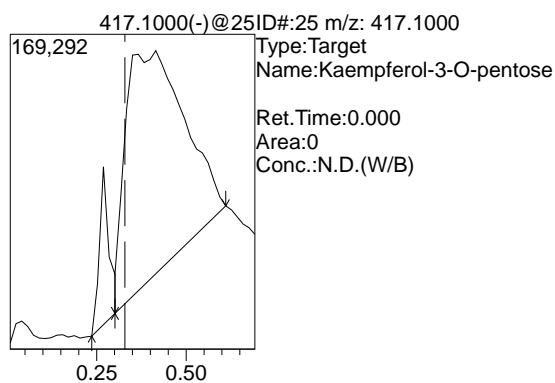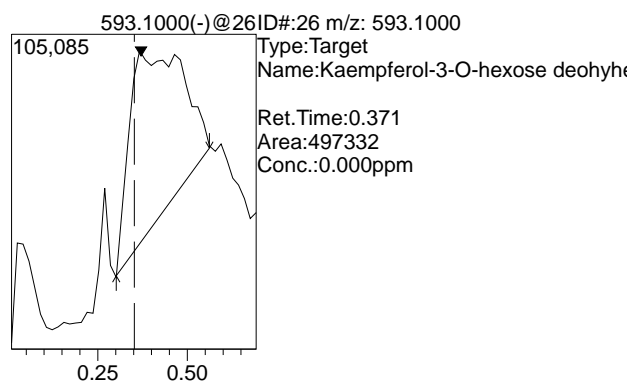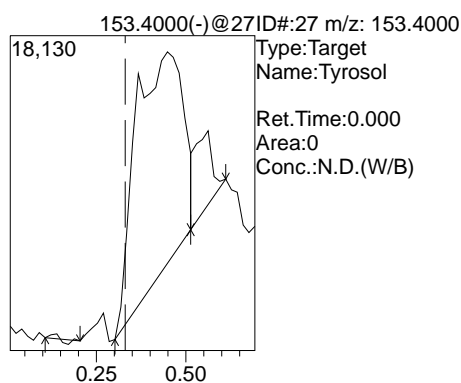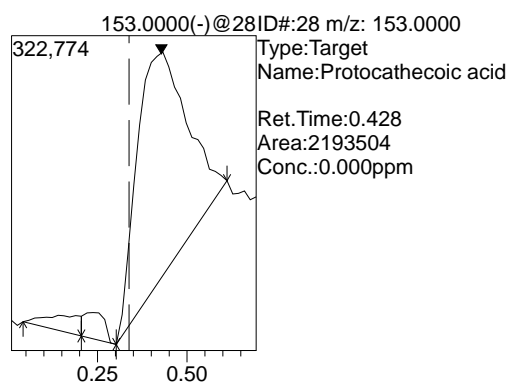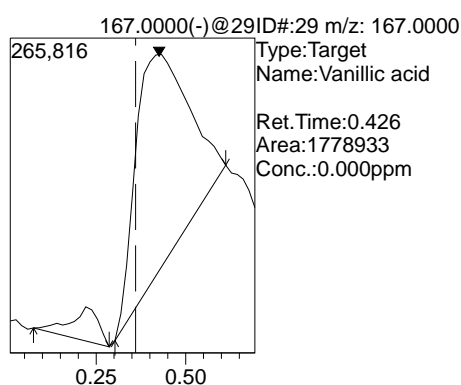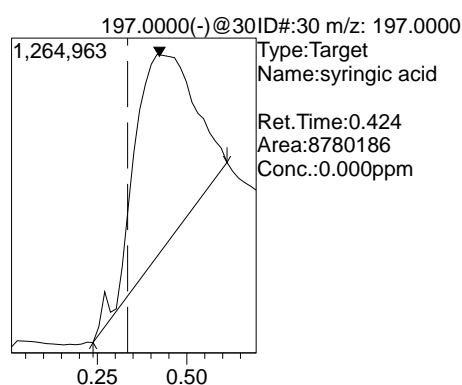

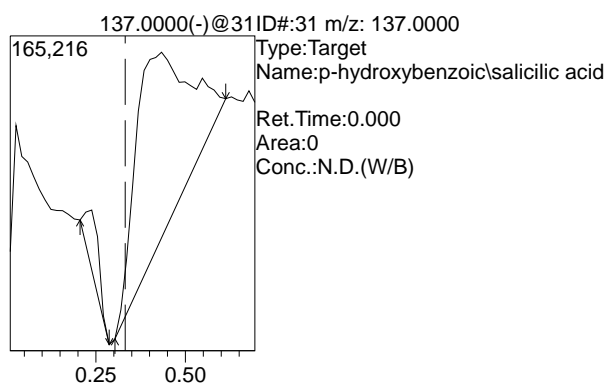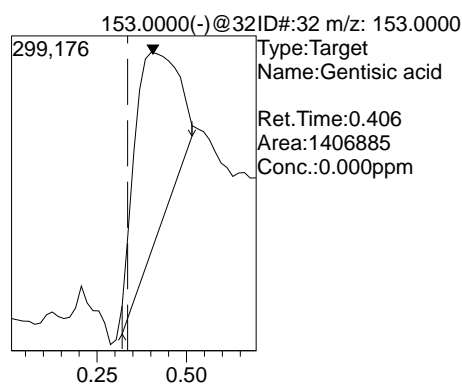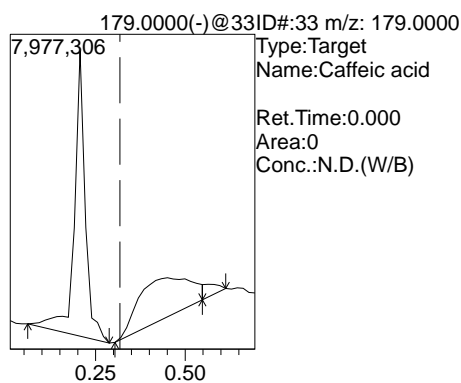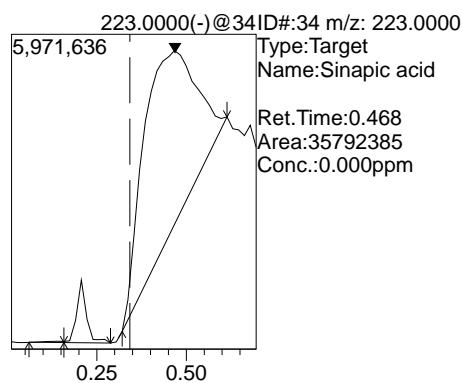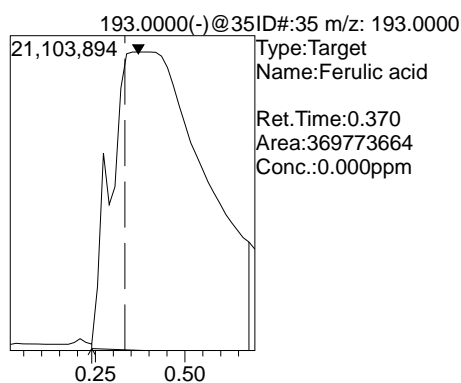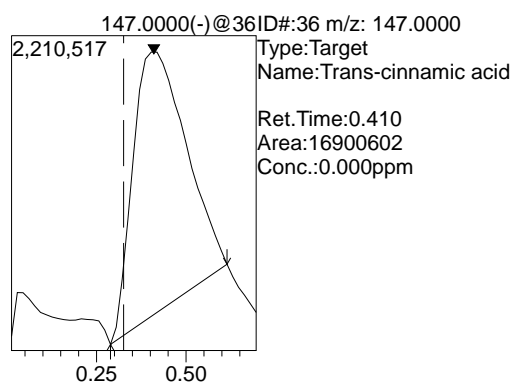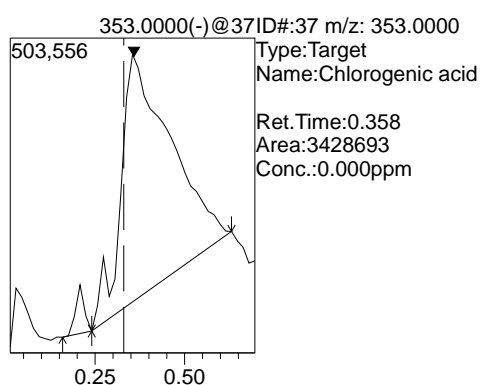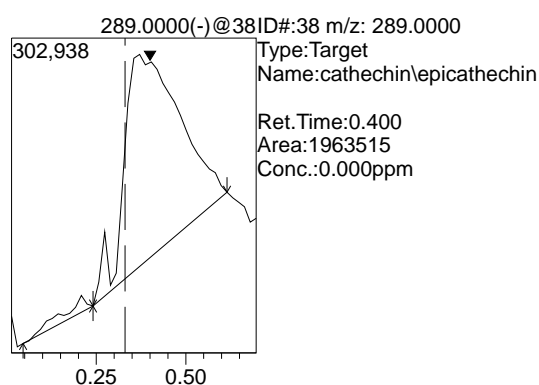

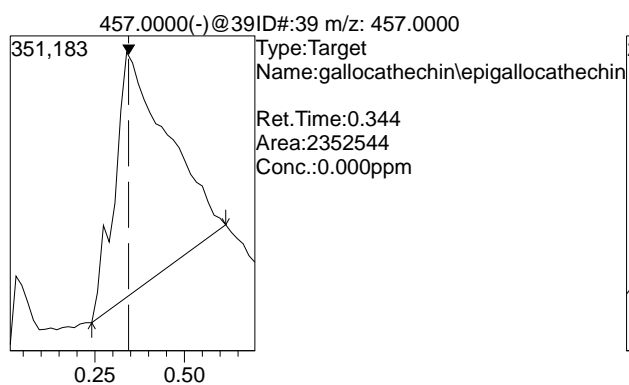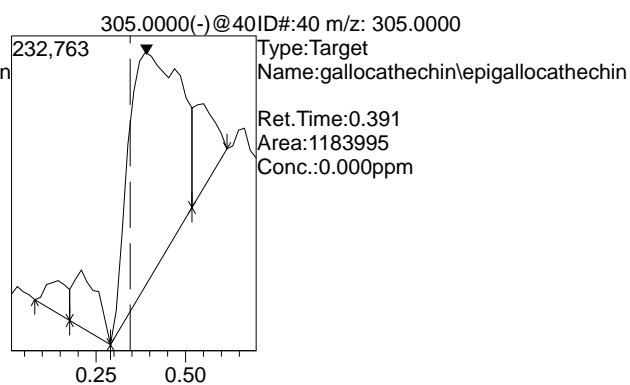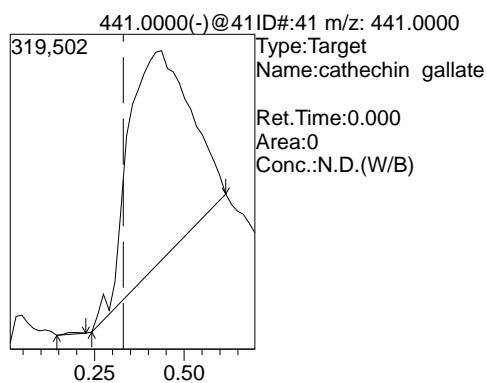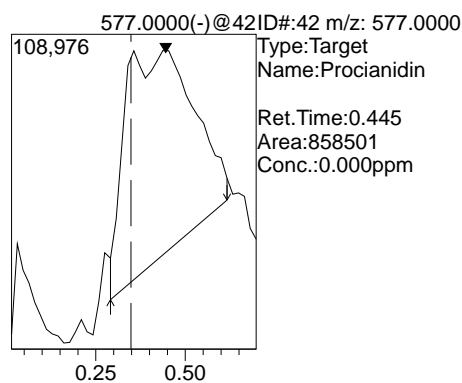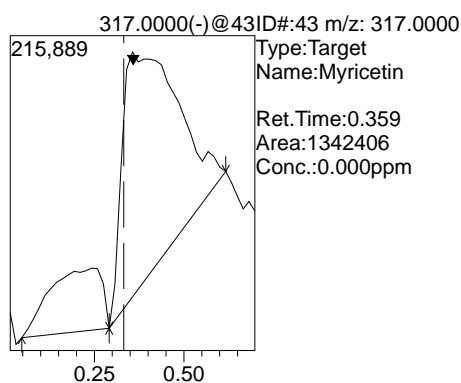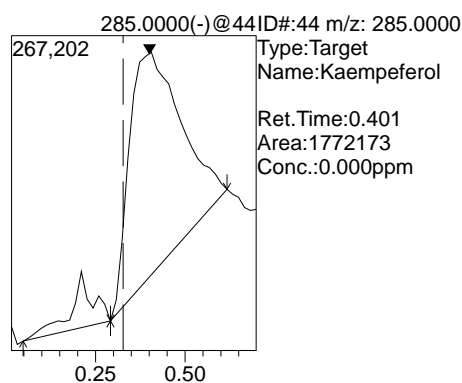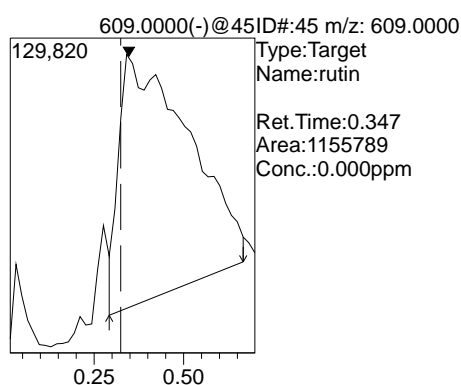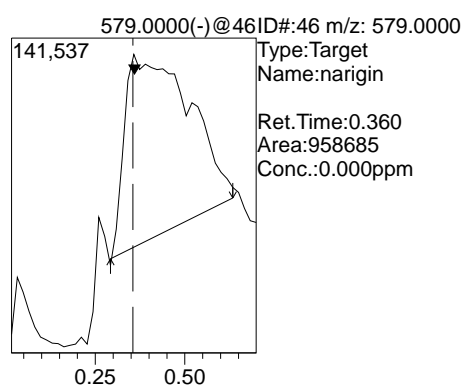

Supplement: s1 [file s1]
